# Supplementary material for: The recombinase Rad51 plays a key role in events of genetic exchange in Trypanosoma cruzi
Source: PubMed Central journal article supplement (PMC6127316; doi:10.1038/s41598-018-31541-z), 2018-09-06
Supplement: 41598_2018_31541_MOESM1_ESM.pdf [file 41598_2018_31541_MOESM1_ESM.pdf]

1 **The recombinase Rad51 plays a key role in events of genetic exchange in *Trypanosoma***  
2 ***cruzi***

3 Ceres Luciana Alves<sup>1\*</sup>, Bruno Marçal Repolês<sup>1\*</sup>, Marcelo Santos da Silva<sup>2\*</sup>, Isabela Cecília  
4 Mendes<sup>1</sup>, Paula Andrea Marin<sup>2</sup>, Pedro Henrique Nascimento Aguiar<sup>1</sup>, Selma da Silva Santos<sup>1</sup>,  
5 Glória Regina Franco<sup>1</sup>, Andréa Mara Macedo<sup>1</sup>, Sérgio Danilo Junho Pena<sup>1</sup>, Luciana de Oliveira  
6 Andrade<sup>3</sup>, Alessandra Aparecida Guarneri<sup>4</sup>, Erich Birelli Tahara<sup>1</sup>, Maria Carolina Elias<sup>2</sup>,  
7 Carlos Renato Machado<sup>1\*</sup>

8

9 1 Departamento de Bioquímica e Imunologia, Universidade Federal de Minas Gerais, Belo  
10 Horizonte, MG, Brazil

11 2 Laboratório Especial de Ciclo Celular, Centro de Toxinas, Resposta Imune e Sinalização  
12 Celular, Instituto Butantan, São Paulo, Brazil

13 3 Departamento de Morfologia, Universidade Federal de Minas Gerais, Belo Horizonte, MG,  
14 Brazil

15 4 Centro de Pesquisas René Rachou, FIOCRUZ, Belo Horizonte, MG, Brazil

16

17 \* These authors contributed equally to the work

18 **Corresponding Author**

19 Carlos Renato Machado

20 Departamento de Bioquímica e Imunologia, ICB, UFMG Av. Antonio Carlos, 6627, Caixa  
21 postal 486, Belo Horizonte, MG Brazil.

22 E-mail: crmachad@icb.ufmg.br

23

**A**

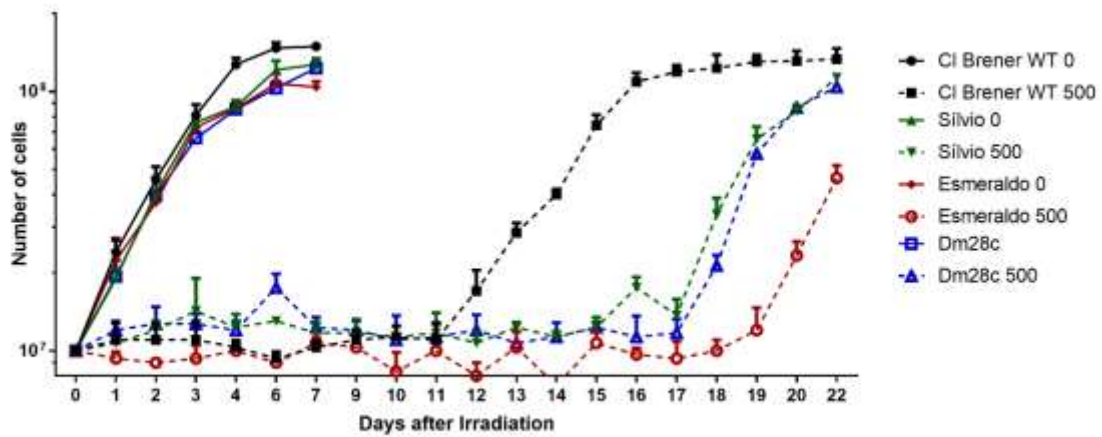

**B**

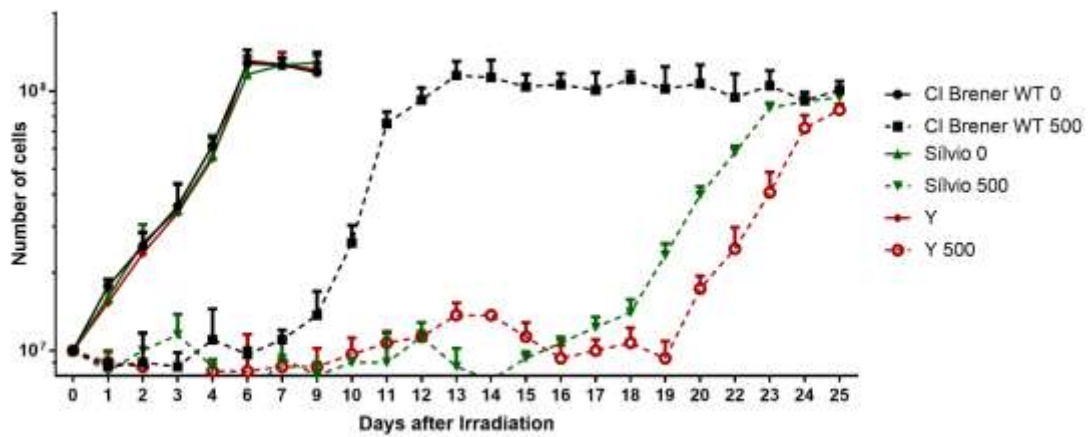

**C**

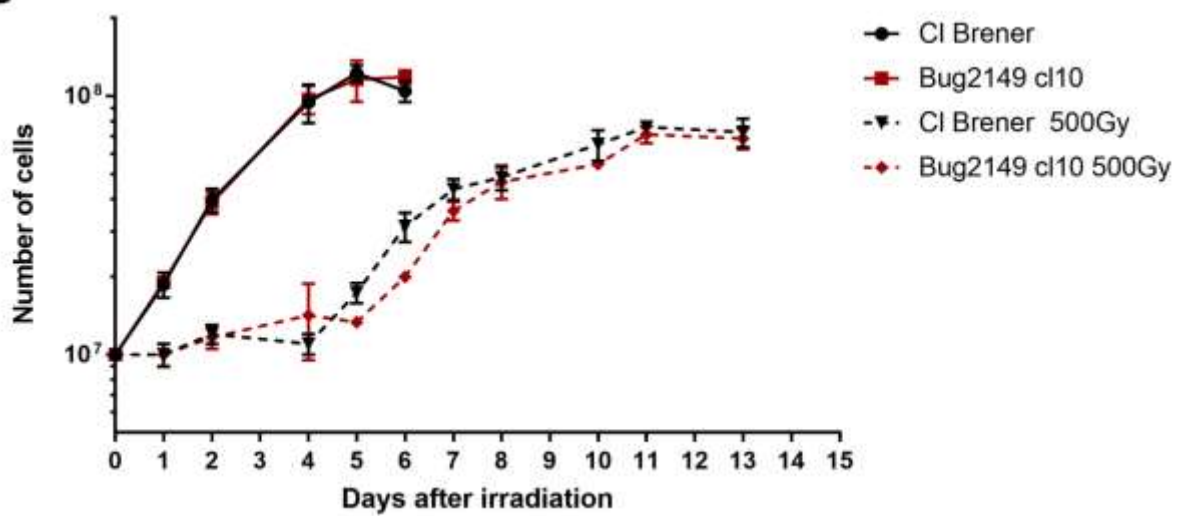

26 **S1 Fig. Determination of cellular growth arrest in different strains of *T. cruzi*.** *T. cruzi*  
27 epimastigotes were exposed to 500 Gy of ionizing radiation. **A:** Dm28c strain, a naturally-  
28 occurring non-hybrid cell (TcI), presents increased cellular growth arrest after irradiation. **B:**  
29 Y strain, a naturally-occurring non-hybrid cell (TcII), also presents increased cellular growth  
30 arrest after irradiation. **C:** TcBug strain, a naturally-occurring hybrid cell (TcV), resumes its  
31 growth simultaneously with CL Brener WT strain.

32

**A**IdU [100  $\mu$ M]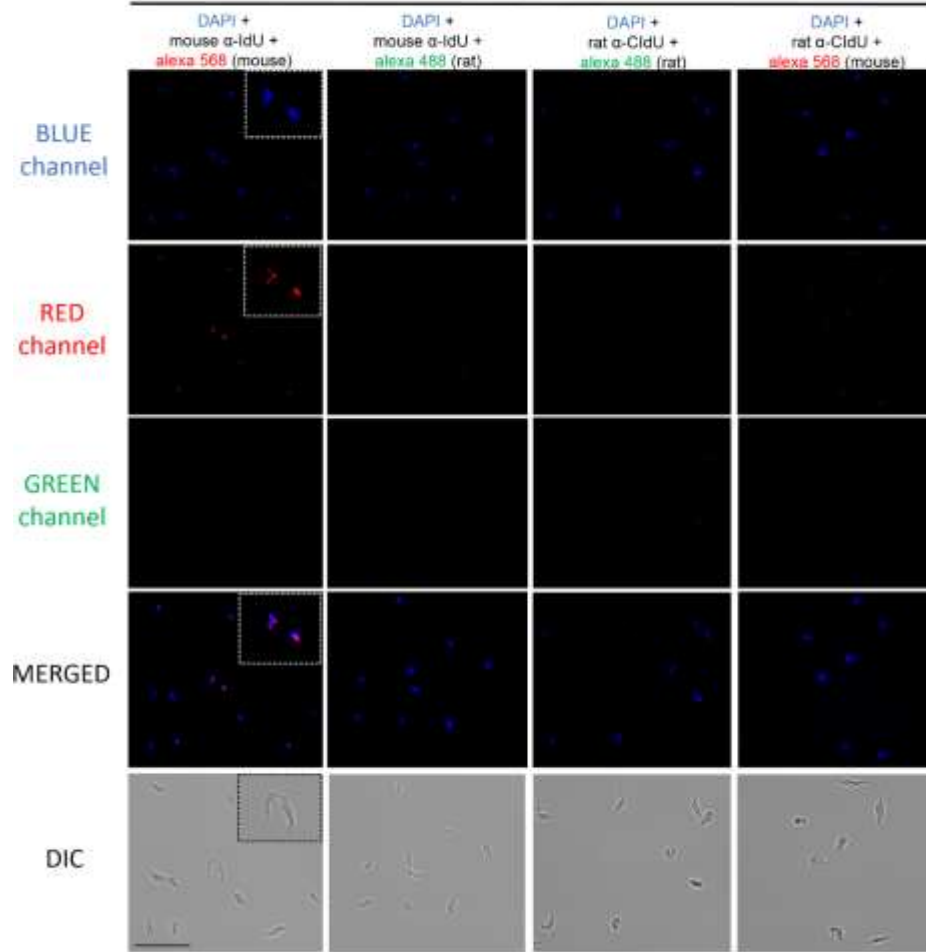**B**CldU [100  $\mu$ M]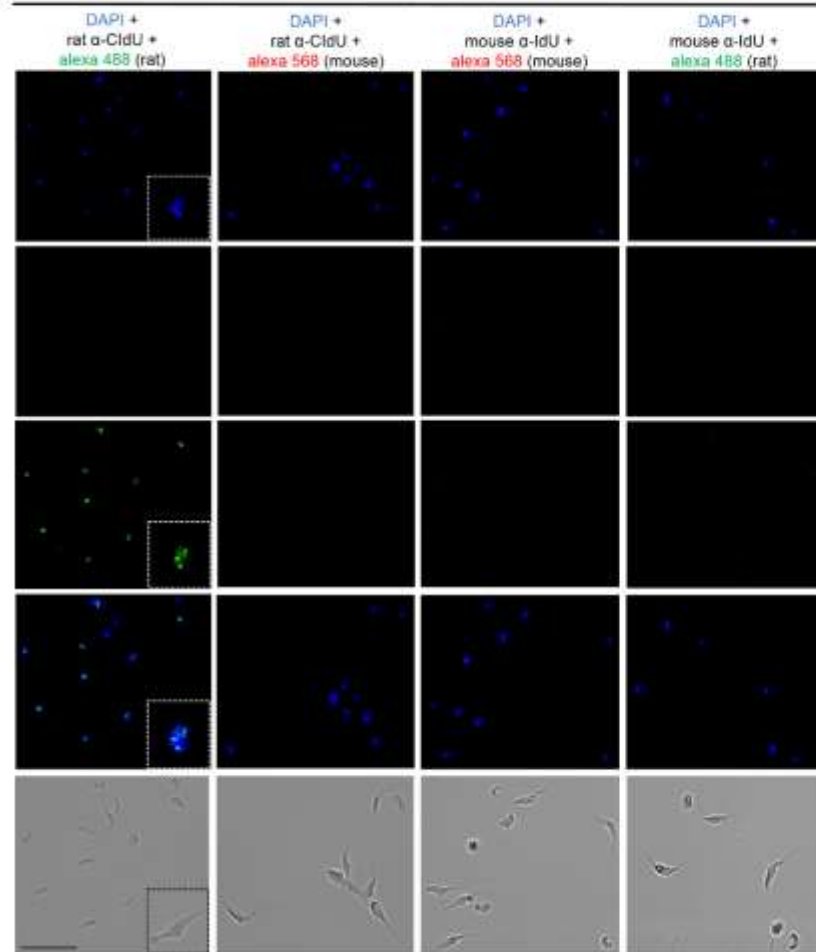**C**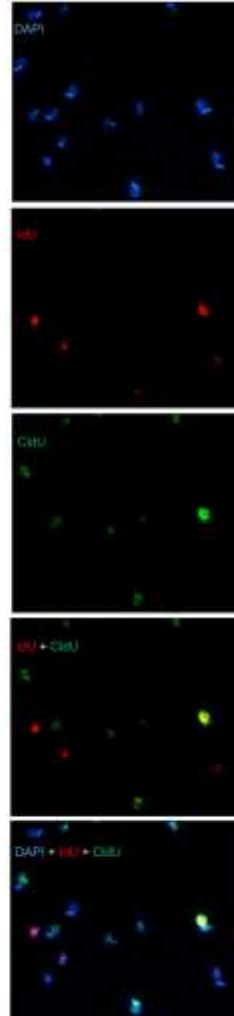

34 **S2 Fig. The recognition thymidine analogues is specific.** Epimastigotes of *T. cruzi* clone  
35 CL Brener were incubated in the presence of thymidine analogues for 12 h. **A:** IdU-  
36 incorporated epimastigotes were added onto slides, and processed for detection using  $\alpha$ -CldU  
37 and the corresponding secondary antibody (Alexa Fluor 488). Small squares show  
38 representative images of each channel observed in the large square (merged), which is the  
39 superimposition of DAPI + green + red channels. We observed complete absence of cross-  
40 reactions. **B.** CldU-incorporated epimastigotes were added onto slides and processed in the  
41 same manner as previously described, but using  $\alpha$ -IdU and the corresponding secondary  
42 antibody (Alexa Fluor 555). As previously indicated, small squares show representative  
43 images of each channel observed in the large square (merged), which is the superposition of  
44 DAPI + green + red channels. We observed again complete absence of cross-reactions.  
45 Images were analysed using Olympus BX51 fluorescence microscope, and captured  
46 randomly. N: nucleus; K: kinetoplast. Bar represents 200  $\mu$ m. **C.** Secondary antibodies  
47 specificities test: as demonstrate on the figure, there's no cross detection among the antibodies  
48 used on the experiment. The secondary antibody for one thymidine analog do not present any  
49 detection with the secondary antibody for the other analog. From up to down: DAPI staining;  
50 IdU-incorporated detection using  $\alpha$ -IdU, and processed for detection using the respective  
51 secondary antibody (Alexa Fluor 555); CldU-incorporated detection using  $\alpha$ -CldU, and  
52 processed for detection using the respective secondary antibody (Alexa Fluor 498); Double  
53 detection of both analogs by using the secondary antibodies for CldU and IdU; DAPI+  $\alpha$ IdU  
54 Alexa Fluor 555 +  $\alpha$ CldU Alexa Fluor 488 merge.

55

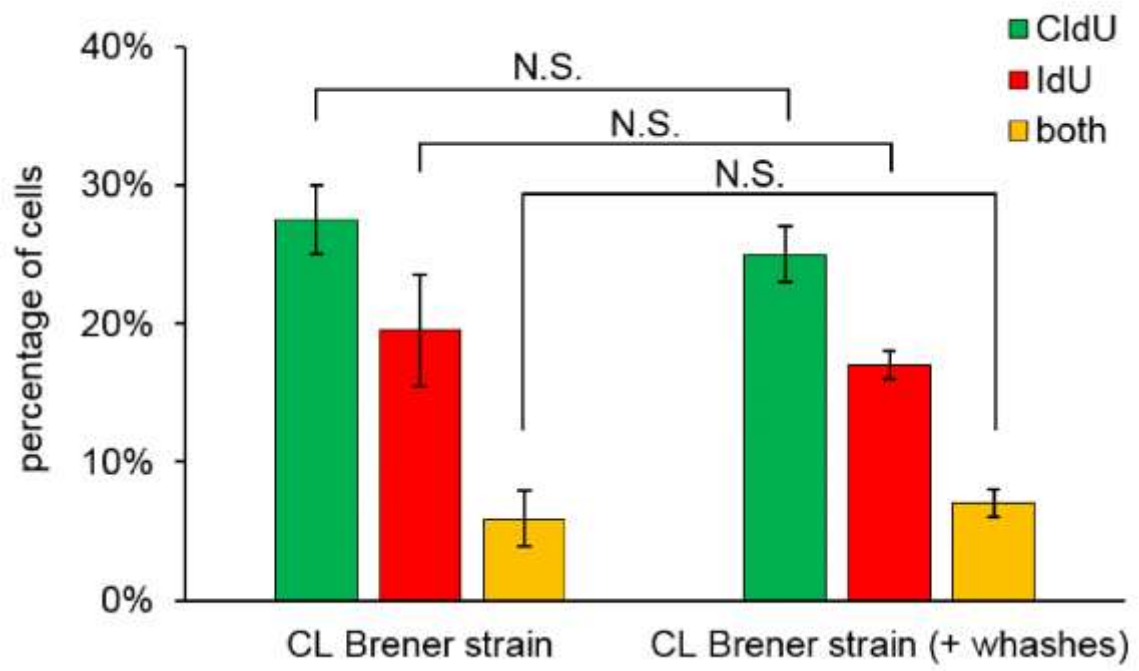

56

57 **S3 Fig. Washes increasing the buffer volume do not alter significantly the percentage of**  
58 **labeled cells.** Percentage of epimastigotes of *T. cruzi* CL Brener labeled with CldU (green),  
59 IdU (red), or with both analogues (yellow) did no show significant alterations after increasing  
60 the wash buffer volume from 1 mL each wash to 15 mL each wash (+ washes). n = 335 cells  
61 for CL Brener and n = 341 cells of CL Brener (+ washes). Experiments were carried out in  
62 triplicate, and error bars indicate standard deviation (SD). Statistical analysis was performed  
63 using Student's *t*-test.  
64  
65
